# Supplementary material for: A timer-actuated immunoassay cassette for detecting molecular markers in oral fluids
Source: Royal Society of Chemistry journal article supplement (doi:10.1039/b814322f), 2008-12-05
Supplement: b814322f.pdf [file b814322f.pdf]

## Supplementary Information

### *A Timer-Actuated, Immunoassay Cassette for Detecting Molecular Markers in Oral Fluids*

Changchun Liu, Xianbo Qiu, Serge Ongagna, Dafeng Chen, Zongyuan Chen, William R. Abrams, Daniel Malamud, Paul L.A.M. Corstjens, and Haim H. Bau

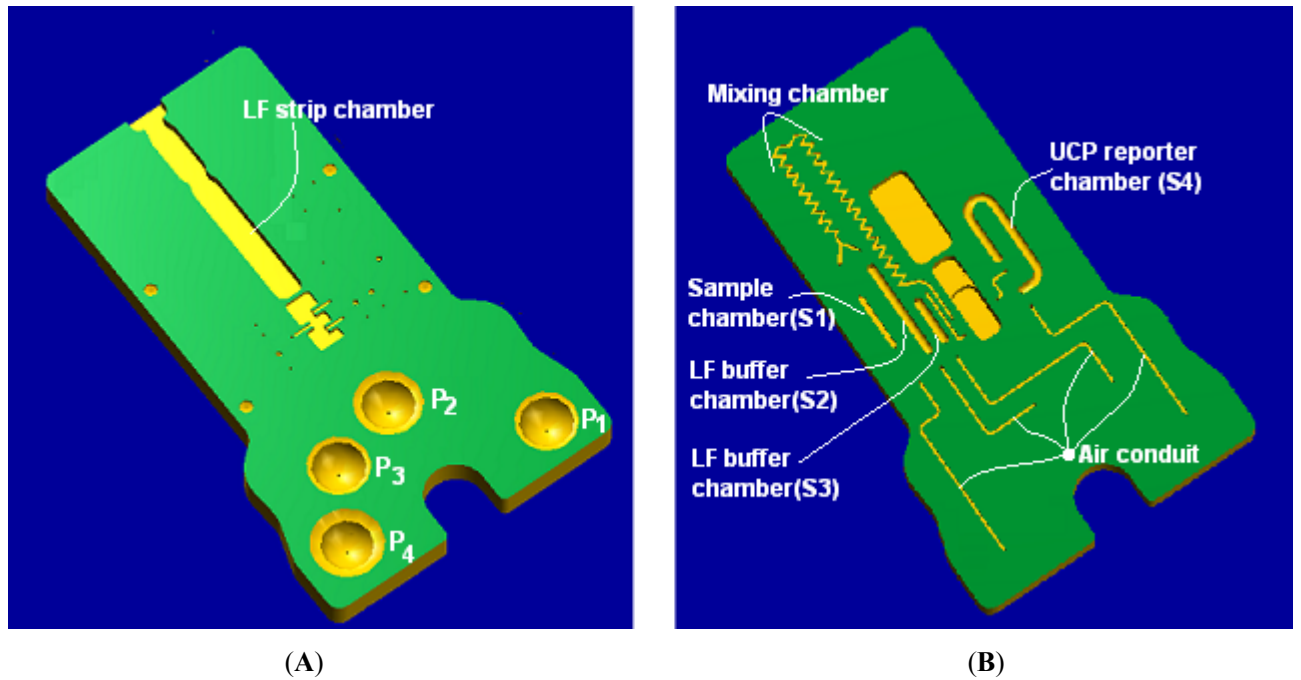

**Fig. S1:** CAD rendering of the polycarbonate, microfluidic chip. (A) Top surface: the diameters of pouches P<sub>1</sub>, P<sub>2</sub>, P<sub>3</sub> and P<sub>4</sub> are, respectively, 11mm, 11.5mm, 11mm, and 12mm. (B) Bottom surface with the storage chambers and the mixing, zig-zag conduit.

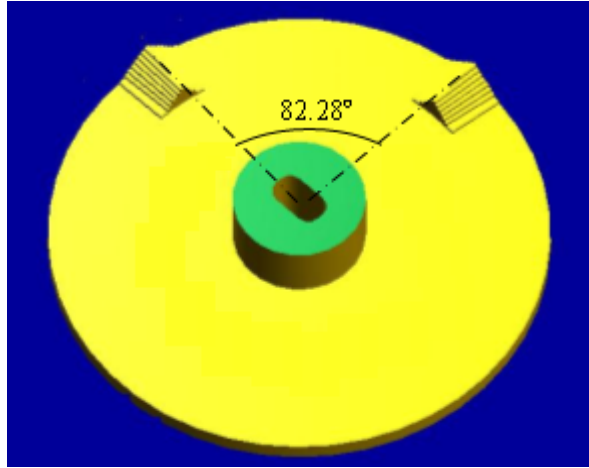

(A)

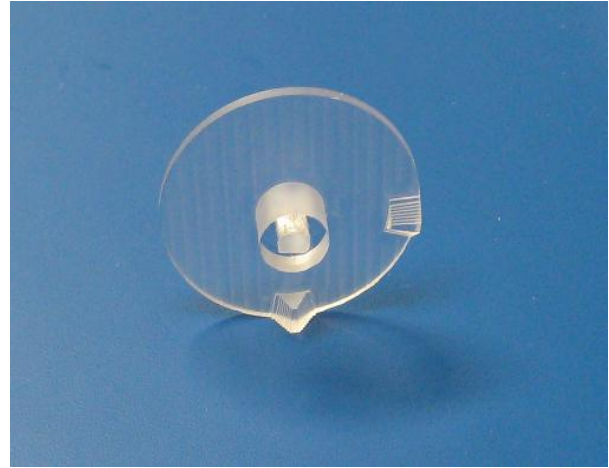

(B)

**Fig. S2:** The actuating disc of the timer-based actuator. (A) Three-dimensional CAD rendering. (B) A photograph of the actuating disk..

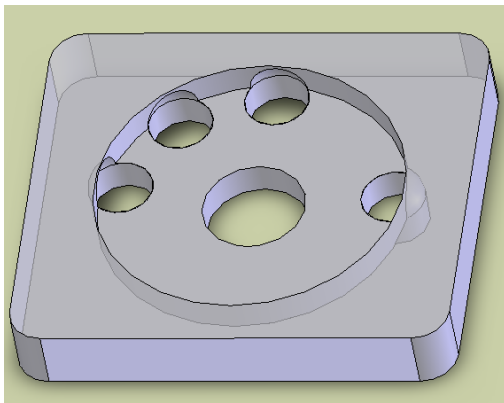

(A)

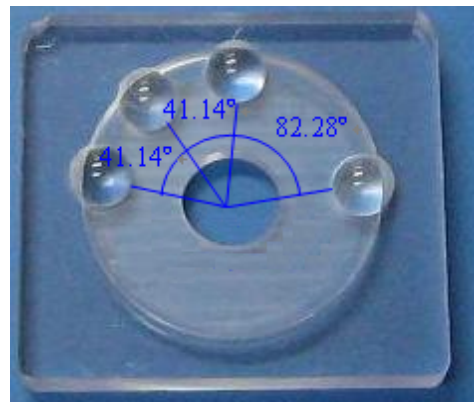

(B)

**Fig. S3:** The ball-holding cage of the timer actuator. (A) A CAD rendering of the cage. (B) A photograph of the actual cage with the balls.

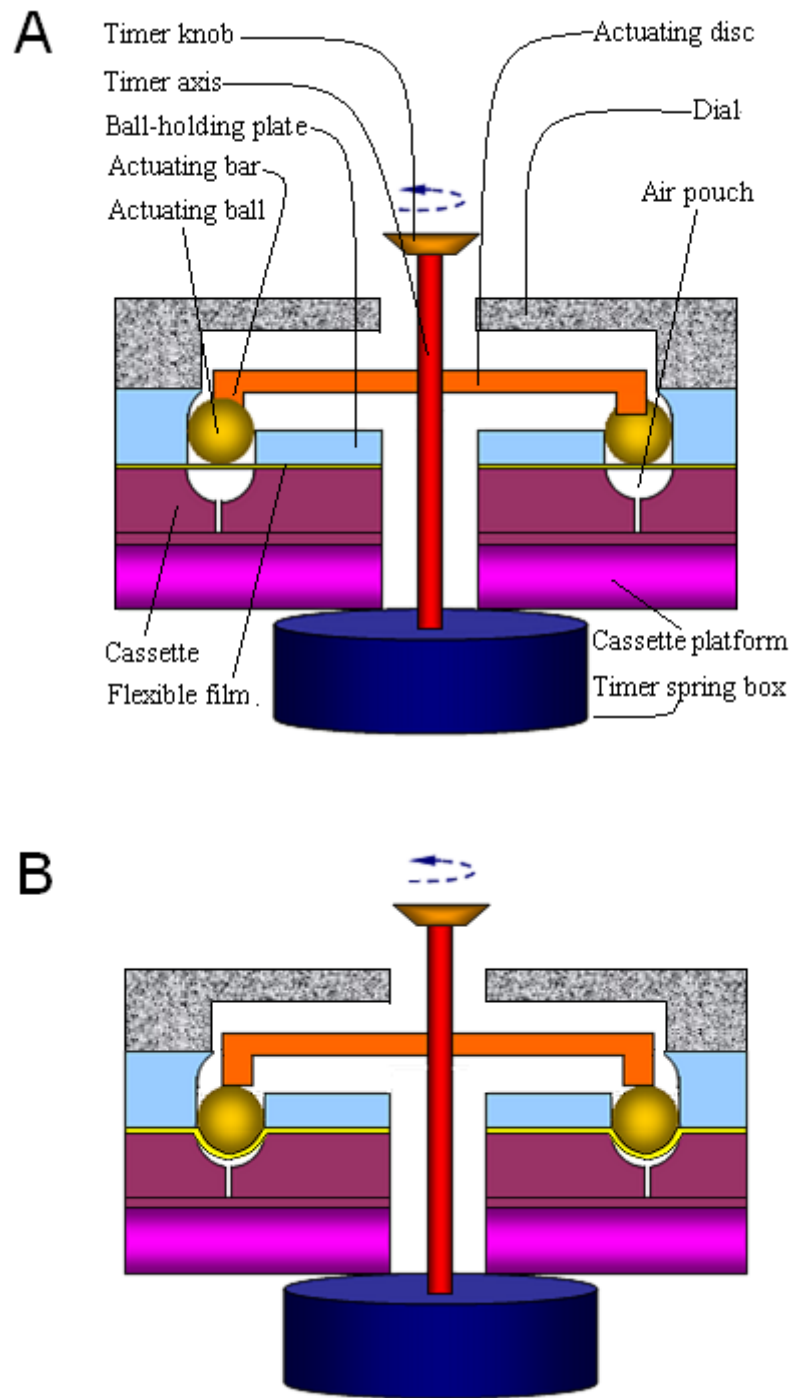

**Fig. S4:** The actuating mechanism of the timer-based actuator. (A) The position of the actuator prior to the actuation. After the knob is turned clockwise and the timer is set, the self-contained immunoassay cassette is inserted into the cassette bay of the actuator and the actuating disc rotates counter-clockwise. (B) The actuator actuating two pouches,  $P_1$  and  $P_2$ , (Fig. 1 in the manuscript) concurrently to facilitate simultaneous discharge of the sample and buffer from chambers S1 and S2 and mixing.

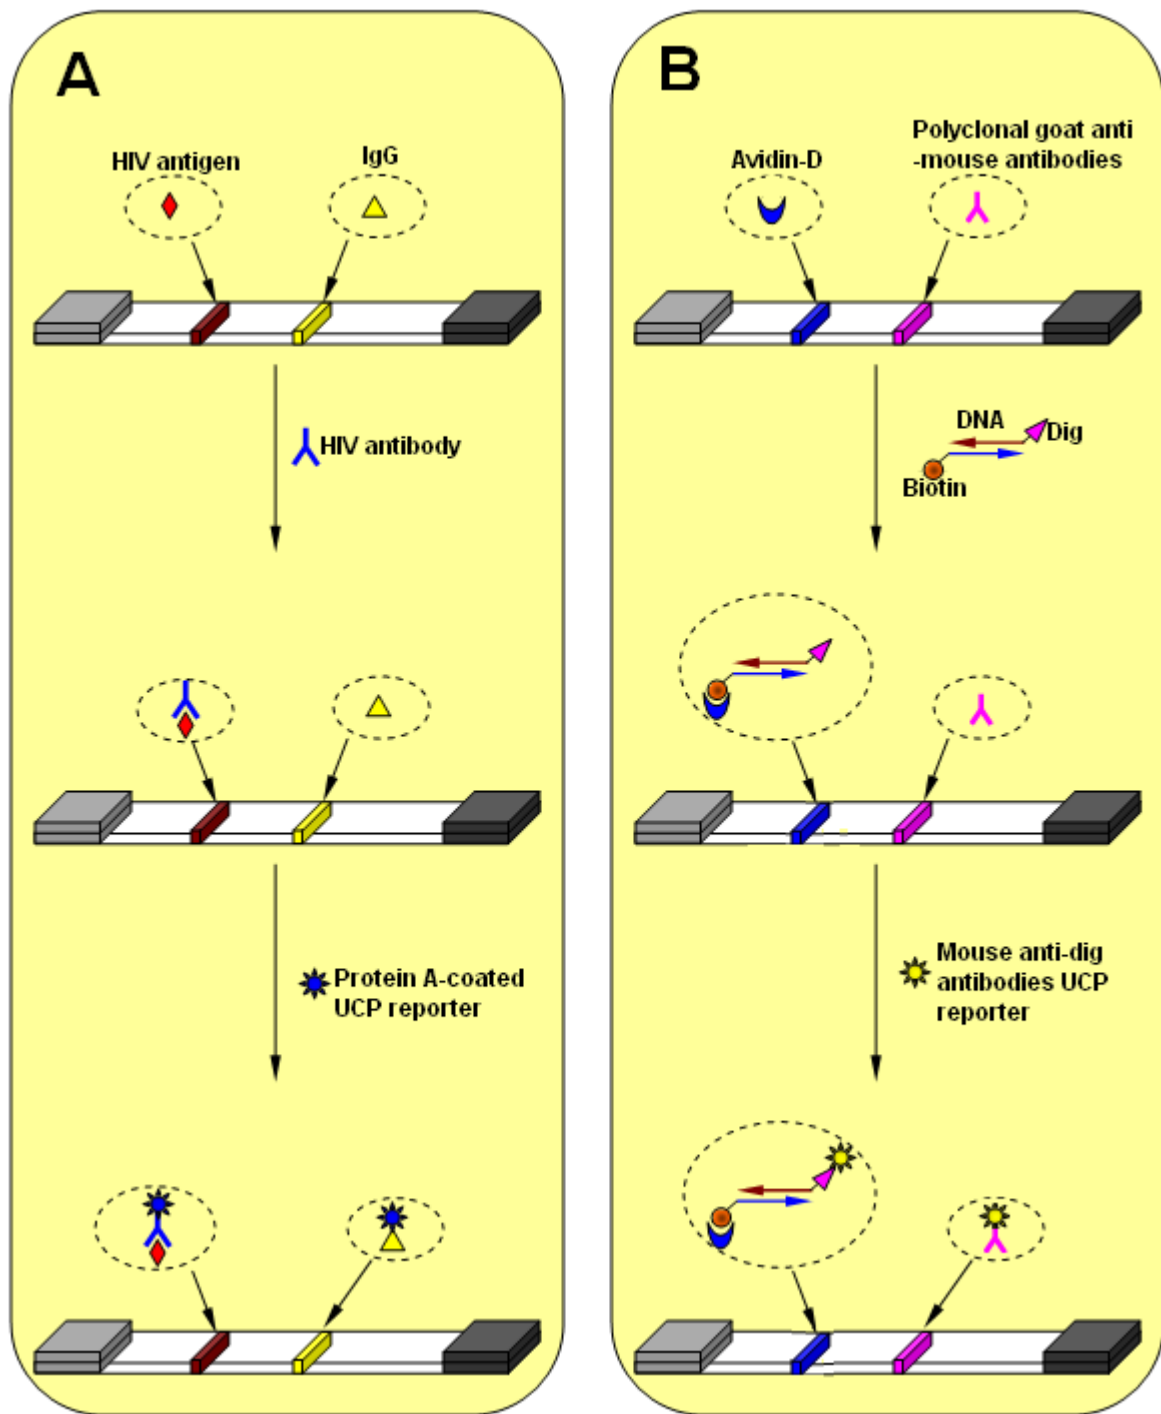

**Fig. S5:** A schematic of the UCP-LF based immunoassay. (A) HIV antibody test. (B) Haptenized DNA test.
